# Supplementary material for: Reactivity and mechanisms of hydridic hydrogen of B–H in ammonia borane towards acetic acids: the ammonia B-monoacyloxy boranes
Source: Royal Society of Chemistry journal article supplement (doi:10.1039/d1nj01727f), 2021-01-01
Supplement: d1nj01727f1.pdf [file d1nj01727f1.pdf]

## Supporting Information

### Reactivity and mechanisms of hydridic hydrogen of B-H in ammonia borane towards acetic acids: the ammonia B-monoacyloxy boranes

*Huizhen Li,<sup>\*,ab</sup> Yunhui Li,<sup>†a</sup> Jiaxin Kang,<sup>†b</sup> Lin Fan,<sup>d</sup> Qiuyu Yang,<sup>\*,b</sup> Shujun Li,<sup>b</sup> Abdul Rahman,<sup>a</sup>*

*Daqi Chen<sup>\*,c</sup>*

<sup>a</sup>School of Chemistry and Chemical Engineering, Guangzhou University, Guangzhou 510006, P. R. China

<sup>b</sup>Henan Key Laboratory of Boron Chemistry and Advanced Energy Materials, School of Chemistry and Chemical Engineering, Henan Normal University, Xixiang, Henan 453007, P. R. China

<sup>c</sup>School of Mechanical and Electrical Engineering, Guangzhou University, Guangzhou, 510006, P. R. China

<sup>d</sup>Beijing Normal University Publishing Group, College of Chemistry, Beijing Normal University, Beijing 100875, P. R. China

## Table of Contents

|                                                                                                                                                                                                                                                        |    |
|--------------------------------------------------------------------------------------------------------------------------------------------------------------------------------------------------------------------------------------------------------|----|
| <b>1. Supporting Results</b> .....                                                                                                                                                                                                                     | 4  |
| <b>Figure S1a.</b> $^{11}\text{B}$ NMR spectrum of $\text{NH}_3\text{BH}_2\text{OOCCH}_3$ in $\text{CD}_3\text{CN}$ . ....                                                                                                                             | 4  |
| <b>Figure S1b.</b> $^1\text{H}$ NMR spectrum of the product $\text{H}_2$ in $d_8$ -Toluene. ....                                                                                                                                                       | 4  |
| <b>Figure S2a.</b> $^{11}\text{B}$ NMR spectrum of $2\text{NH}_3\text{BH}_2\text{OOCCH}_2\text{Cl}$ $\text{C}_{12}\text{H}_{24}\text{O}_6$ ( <b>1</b> ) in $\text{CD}_3\text{CN}$ .....                                                                | 5  |
| <b>Figure S2b.</b> $^1\text{H}$ NMR spectrum of $2\text{NH}_3\text{BH}_2\text{OOCCH}_2\text{Cl}$ $\text{C}_{12}\text{H}_{24}\text{O}_6$ ( <b>1</b> ) in $\text{CD}_3\text{CN}$ . ....                                                                  | 5  |
| <b>Figure S2c.</b> $^{13}\text{C}$ NMR spectrum of $2\text{NH}_3\text{BH}_2\text{OOCCH}_2\text{Cl}$ $\text{C}_{12}\text{H}_{24}\text{O}_6$ ( <b>1</b> ) in $\text{CD}_3\text{CN}$ .....                                                                | 6  |
| <b>Figure S2d.</b> FTIR spectrum of $2\text{NH}_3\text{BH}_2\text{OOCCH}_2\text{Cl}$ $\text{C}_{12}\text{H}_{24}\text{O}_6$ ( <b>1</b> ). ....                                                                                                         | 6  |
| <b>Figure S3a.</b> $^{11}\text{B}$ NMR spectrum of $2\text{NH}_3\text{BH}_2\text{OOCCHCl}_2$ $\text{C}_{12}\text{H}_{24}\text{O}_6$ ( <b>2</b> ) in $\text{CD}_3\text{CN}$ .....                                                                       | 7  |
| <b>Figure S3b.</b> $^1\text{H}$ NMR spectrum of $2\text{NH}_3\text{BH}_2\text{OOCCHCl}_2$ $\text{C}_{12}\text{H}_{24}\text{O}_6$ ( <b>2</b> ) in $\text{CD}_3\text{CN}$ .....                                                                          | 7  |
| <b>Figure S3c.</b> $^{13}\text{C}$ NMR spectrum of $2\text{NH}_3\text{BH}_2\text{OOCCHCl}_2$ $\text{C}_{12}\text{H}_{24}\text{O}_6$ ( <b>2</b> ) in $\text{CD}_3\text{CN}$ . ....                                                                      | 8  |
| <b>Figure S3d.</b> FTIR spectrum of $2\text{NH}_3\text{BH}_2\text{OOCCHCl}_2$ $\text{C}_{12}\text{H}_{24}\text{O}_6$ ( <b>2</b> ). ....                                                                                                                | 8  |
| <b>Figure S4.</b> $^{11}\text{B}$ NMR spectrum of $\text{NH}_3\text{BH}_2\text{OOCCL}_3$ in $\text{CD}_3\text{CN}$ .....                                                                                                                               | 9  |
| <b>Table S1.</b> The chemical shifts of B in the ammonia B-monoacyloxy boranes. ....                                                                                                                                                                   | 9  |
| <b>Table S2.</b> Crystallographic data for $2\text{NH}_3\text{BH}_2\text{OOCCH}_2\text{Cl}$ $\text{C}_{12}\text{H}_{24}\text{O}_6$ ( <b>1</b> ) and $2\text{NH}_3\text{BH}_2\text{OOCCHCl}_2$ $\text{C}_{12}\text{H}_{24}\text{O}_6$ ( <b>2</b> )..... | 10 |
| <b>Table S3.</b> Bond lengths ( $\text{\AA}$ ) and bond angles ( $^\circ$ ) of $2\text{NH}_3\text{BH}_2\text{OOCCH}_2\text{Cl}$ $\text{C}_{12}\text{H}_{24}\text{O}_6$ ( <b>1</b> ). ....                                                              | 11 |
| <b>Table S4.</b> Bond lengths ( $\text{\AA}$ ) and bond angles ( $^\circ$ ) of $2\text{NH}_3\text{BH}_2\text{OOCCHCl}_2$ $\text{C}_{12}\text{H}_{24}\text{O}_6$ ( <b>2</b> ). ....                                                                     | 11 |
| <b>Figure S5.</b> $^{11}\text{B}$ NMR spectra of the reaction mixture of AB with $\text{CH}_3\text{COOH}$ with different concentration in 14 h ( $c_{\text{AB}} = 1\sim 6$ M, the conversion of AB: %).....                                            | 12 |
| <b>Figure S6.</b> $^{11}\text{B}$ NMR spectra of the reaction mixture of AB with $\text{CCl}_3\text{COOH}$ at a ratio of 1:1 ( $c_{\text{AB}} = 0.13\sim 0.75$ M, the conversion of AB: %). ....                                                       | 12 |
| <b>Figure S7.</b> $^{11}\text{B}$ NMR spectrum of the reaction mixture of AB with excess $\text{ClCH}_2\text{COOH}$ over a period of 10 d. ....                                                                                                        | 13 |
| <b>Figure S8.</b> $^{11}\text{B}$ NMR spectra of the reaction of AB with $\text{CH}_3\text{COOH}$ at $70^\circ\text{C}$ ( $n_{\text{AB}}: n_{\text{acid}}$ to 1:1, $c_{\text{AB}} = 3$ M). ....                                                        | 13 |
| <b>Figure S9a.</b> Energy profile of the reaction of AB with $\text{CH}_3\text{COOH}$ . ....                                                                                                                                                           | 14 |
| <b>Figure S9b.</b> Energy profile of the reaction of AB with $\text{CH}_2\text{ClCOOH}$ . ....                                                                                                                                                         | 14 |
| <b>Figure S9c.</b> Energy profile of the reaction of AB with $\text{CHCl}_2\text{COOH}$ .....                                                                                                                                                          | 15 |

**Figure S10.** Energy profile of the decomposition of AB to produce hydrogen and NH<sub>2</sub>BH<sub>2</sub>.16

**Table S5.** The relative energies { $\Delta(E+ZPE)/(kJ\cdot mol^{-1})$ }, enthalpies { $\Delta H (298 K)/(kJ\cdot mol^{-1})$ }, free energy changes { $\Delta G (298 K)/(kJ\cdot mol^{-1})$ } and entropy { $S (298 K)(J\cdot mol^{-1})$ } for the reactions of AB with CH<sub>3</sub>COOH. ....16

**Table S6.** The relative energies { $\Delta(E + ZPE)/(kJ\cdot mol^{-1})$ }, enthalpies { $\Delta H (298 K)/(kJ\cdot mol^{-1})$ }, free energy changes { $\Delta G (298 K)/(kJ\cdot mol^{-1})$ } and entropy { $S (298 K)(J\cdot mol^{-1})$ } for the reactions of AB with CH<sub>2</sub>ClCOOH.....16

**Table S7.** The relative energies { $\Delta(E + ZPE)/(kJ\cdot mol^{-1})$ }, enthalpies { $\Delta H (298 K)/(kJ\cdot mol^{-1})$ }, free energy changes { $\Delta G (298 K)/(kJ\cdot mol^{-1})$ } and entropy { $S (298 K)(J\cdot mol^{-1})$ } for the reactions of AB with CHCl<sub>2</sub>COOH.....17

**Table S8.** The relative energies { $\Delta(E + ZPE)/(kJ\cdot mol^{-1})$ }, enthalpies { $\Delta H (298 K)/(kJ\cdot mol^{-1})$ }, free energy changes { $\Delta G (298 K)/(kJ\cdot mol^{-1})$ } and entropy { $S (298 K)(J\cdot mol^{-1})$ } for the reactions of AB with CCl<sub>3</sub>COOH. ....17

**Table S9.** The relative energies { $\Delta(E + ZPE)/(kJ\cdot mol^{-1})$ }, enthalpies { $\Delta H (298 K)/(kJ\cdot mol^{-1})$ }, free energy changes { $\Delta G (298 K)/(kJ\cdot mol^{-1})$ } and entropy { $S (298 K)(J\cdot mol^{-1})$ } for the reactions of AB release hydrogen without catalyst. ....18

**Table S10.** The total rate constants for the reactions of AB with acids. ....18

**Figure S11a.** The optimized geometry constructions of the reactions for AB, AB with acetic acid and AB with CH<sub>2</sub>ClCOOH.....19

**Figure S11b.** The optimized geometry constructions of the reactions for AB with CHCl<sub>2</sub>COOH and AB with CCl<sub>3</sub>COOH. ....20

**2. The optimized cartesian coordinates of all species.....21**

## 1. Supporting Results

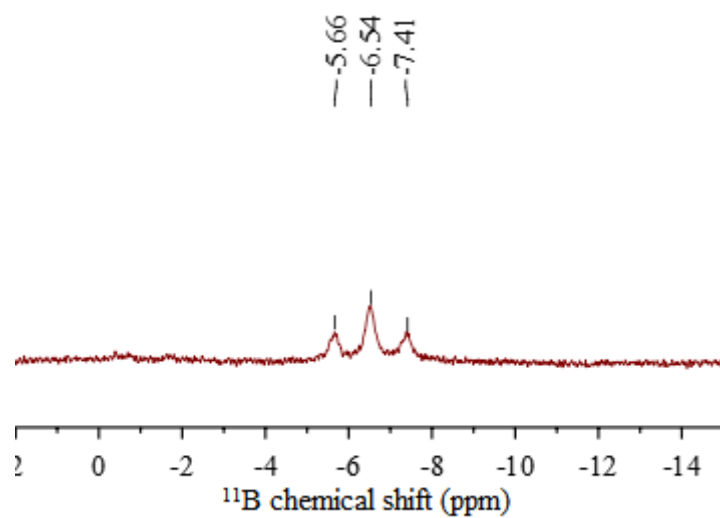

**Figure S1a.**  $^{11}\text{B}$  NMR spectrum of  $\text{NH}_3\text{BH}_2\text{OOCCH}_3$  in  $\text{CD}_3\text{CN}$ .

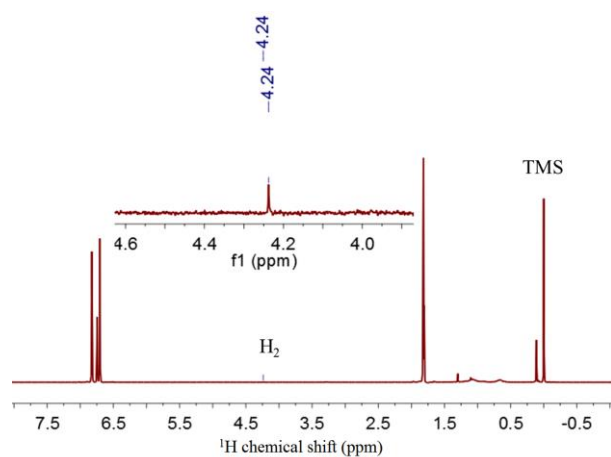

**Figure S1b.**  $^1\text{H}$  NMR spectrum of the product  $\text{H}_2$  in  $d_8$ -Toluene.

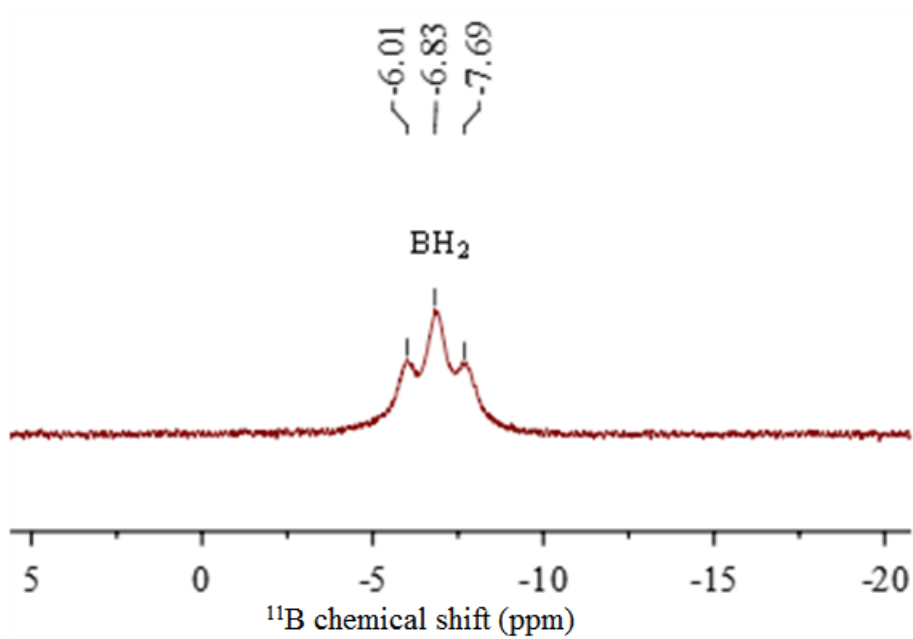

**Figure S2a.**  $^{11}\text{B}$  NMR spectrum of  $2\text{NH}_3\text{BH}_2\text{OOCCH}_2\text{Cl C}_{12}\text{H}_{24}\text{O}_6$  (**1**) in  $\text{CD}_3\text{CN}$ .

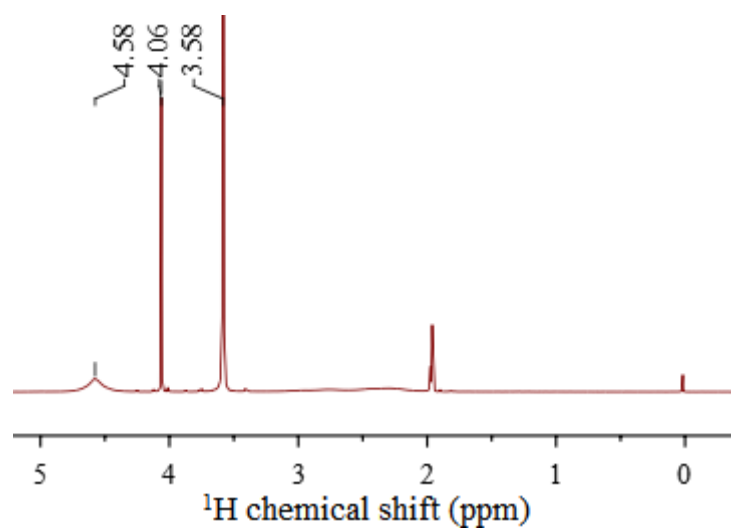

**Figure S2b.**  $^1\text{H}$  NMR spectrum of  $2\text{NH}_3\text{BH}_2\text{OOCCH}_2\text{Cl C}_{12}\text{H}_{24}\text{O}_6$  (**1**) in  $\text{CD}_3\text{CN}$ .

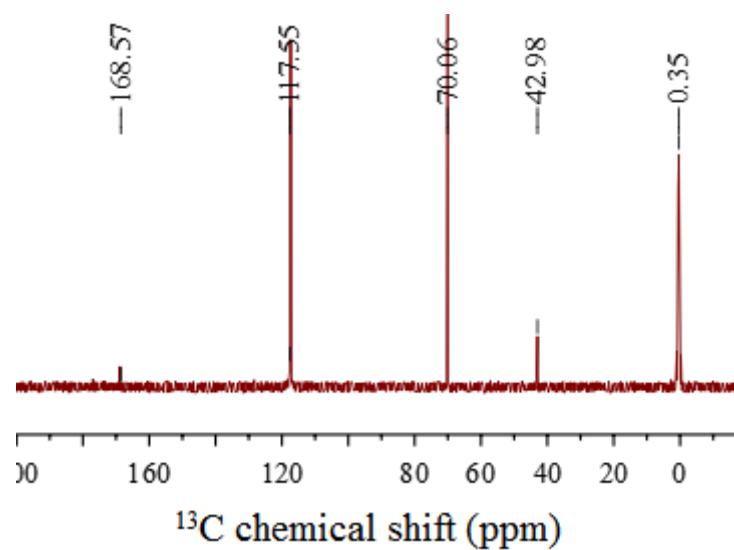

**Figure S2c.**  $^{13}\text{C}$  NMR spectrum of  $2\text{NH}_3\text{BH}_2\text{OOCCH}_2\text{Cl}$   $\text{C}_{12}\text{H}_{24}\text{O}_6$  (**1**) in  $\text{CD}_3\text{CN}$ .

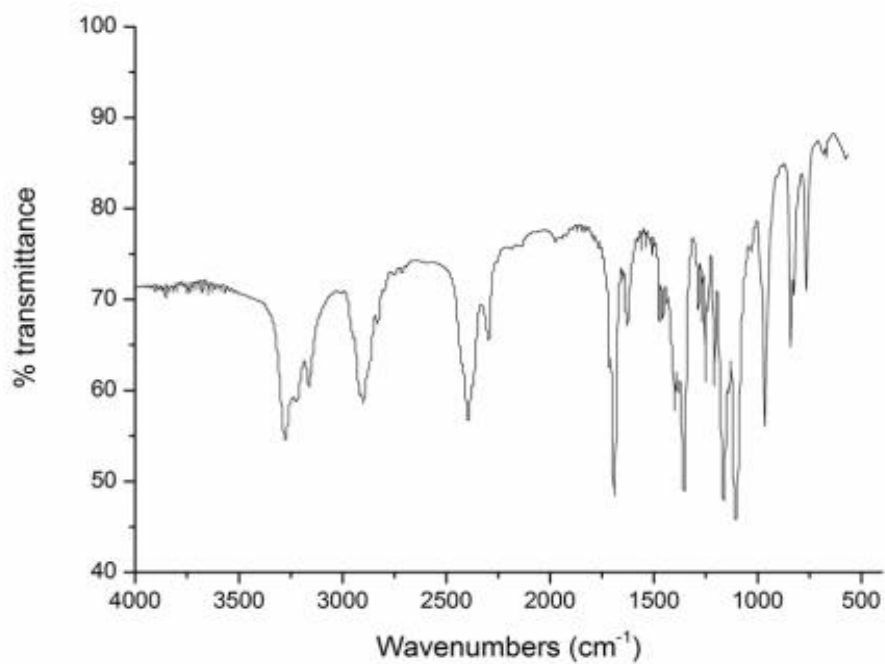

**Figure S2d.** FTIR spectrum of  $2\text{NH}_3\text{BH}_2\text{OOCCH}_2\text{Cl}$   $\text{C}_{12}\text{H}_{24}\text{O}_6$  (**1**).

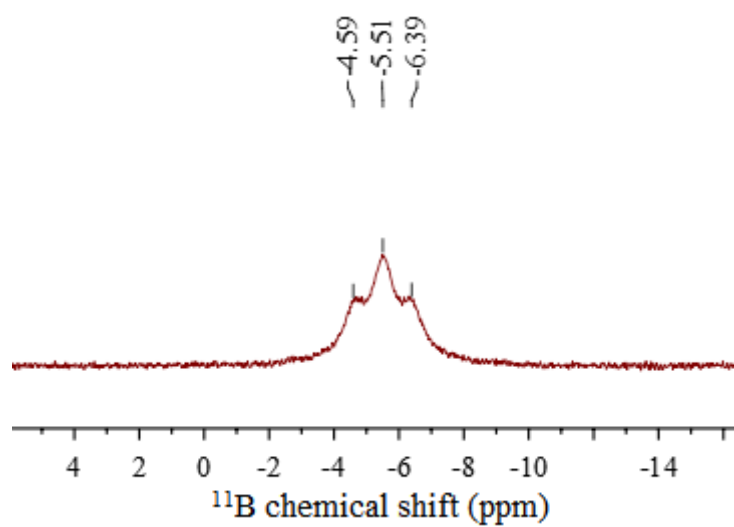

**Figure S3a.**  $^{11}\text{B}$  NMR spectrum of  $2\text{NH}_3\text{BH}_2\text{OOCCHCl}_2 \text{C}_{12}\text{H}_{24}\text{O}_6$  (**2**) in  $\text{CD}_3\text{CN}$ .

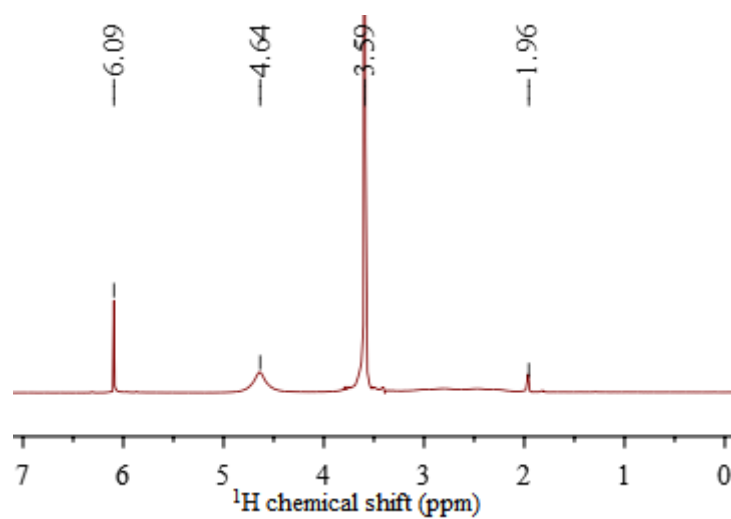

**Figure S3b.**  $^1\text{H}$  NMR spectrum of  $2\text{NH}_3\text{BH}_2\text{OOCCHCl}_2 \text{C}_{12}\text{H}_{24}\text{O}_6$  (**2**) in  $\text{CD}_3\text{CN}$ .

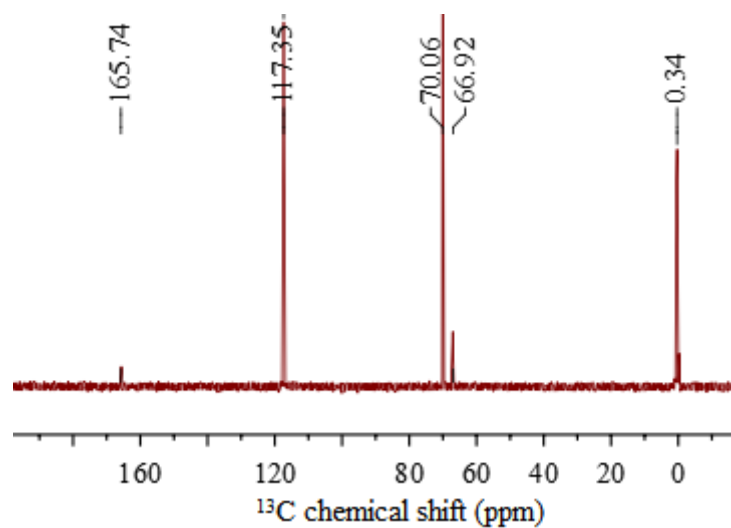

**Figure S3c.**  $^{13}\text{C}$  NMR spectrum of  $2\text{NH}_3\text{BH}_2\text{OOCCHCl}_2 \cdot \text{C}_{12}\text{H}_{24}\text{O}_6$  (**2**) in  $\text{CD}_3\text{CN}$ .

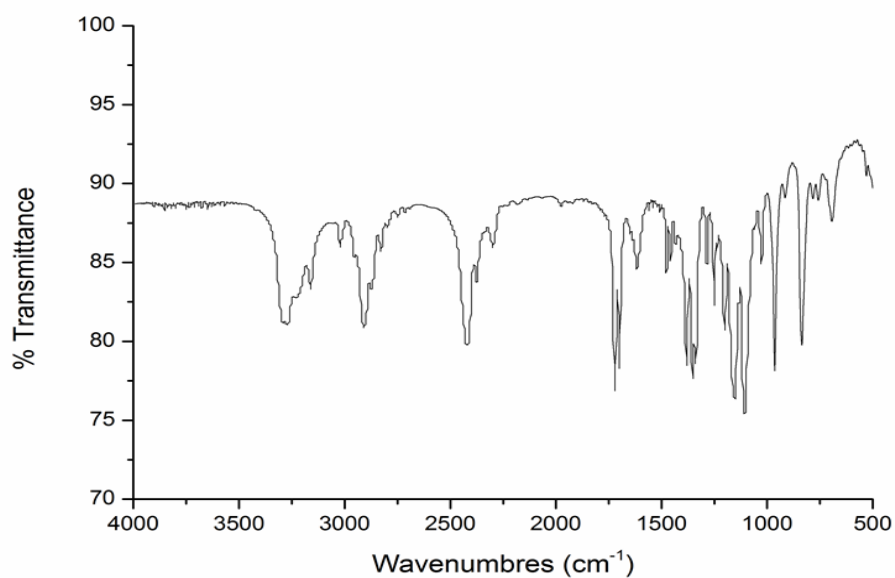

**Figure S3d.** FTIR spectrum of  $2\text{NH}_3\text{BH}_2\text{OOCCHCl}_2 \cdot \text{C}_{12}\text{H}_{24}\text{O}_6$  (**2**).



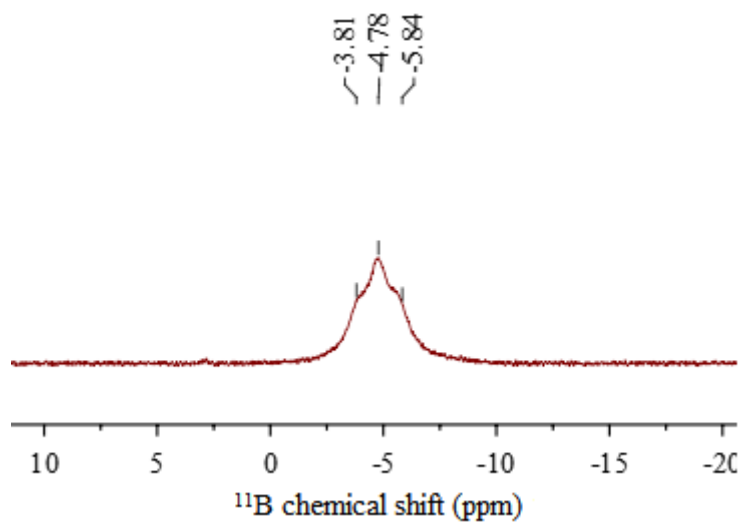

**Figure S4.**  $^{11}\text{B}$  NMR spectrum of  $\text{NH}_3\text{BH}_2\text{OCCCl}_3$  in  $\text{CD}_3\text{CN}$ .

**Table S1.** The chemical shifts of B in the ammonia B-monoacyloxy boranes.

| Ammonia B-monoacyloxy boranes                   | $\delta$ ( $\text{BH}_2$ ), ppm |
|-------------------------------------------------|---------------------------------|
| $\text{NH}_3\text{BH}_2\text{OOCCH}_3$          | -6.5                            |
| $\text{NH}_3\text{BH}_2\text{OOCCH}_2\text{Cl}$ | -5.7                            |
| $\text{NH}_3\text{BH}_2\text{OOCCHCl}_2$        | -5.5                            |
| $\text{NH}_3\text{BH}_2\text{OCCCl}_3$          | -4.8                            |

**Table S2.** Crystallographic data for  $2\text{NH}_3\text{BH}_2\text{OOCCH}_2\text{Cl C}_{12}\text{H}_{24}\text{O}_6$  (**1**) and  $2\text{NH}_3\text{BH}_2\text{OOCCHCl}_2 \text{C}_{12}\text{H}_{24}\text{O}_6$  (**2**).

| Complexes                                                                                           | $2\text{NH}_3\text{BH}_2\text{OOCCH}_2\text{Cl C}_{12}\text{H}_{24}\text{O}_6$ | $2\text{NH}_3\text{BH}_2\text{OOCCHCl}_2 \text{C}_{12}\text{H}_{24}\text{O}_6$ |
|-----------------------------------------------------------------------------------------------------|--------------------------------------------------------------------------------|--------------------------------------------------------------------------------|
|                                                                                                     | O <sub>6</sub>                                                                 |                                                                                |
| Chemical formula                                                                                    | C <sub>8</sub> H <sub>19</sub> BCINO <sub>5</sub>                              | C <sub>8</sub> H <sub>18</sub> BCl <sub>2</sub> NO <sub>5</sub>                |
| Fw (g/mol)                                                                                          | 255.50                                                                         | 289.94                                                                         |
| T (K)                                                                                               | 103.0 (2)                                                                      | 153.0 (2)                                                                      |
| Wavelength (Å)                                                                                      | 0.71073                                                                        | 0.71073                                                                        |
| cryst syst                                                                                          | Monoclinic                                                                     | Monoclinic                                                                     |
| Space group                                                                                         | P2 <sub>1</sub> /n                                                             | P2 <sub>1</sub> /n                                                             |
| <i>a</i> , (Å)                                                                                      | 10.312 (2)                                                                     | 8.616 (1)                                                                      |
| <i>b</i> , (Å)                                                                                      | 12.187 (2)                                                                     | 11.914 (2)                                                                     |
| <i>c</i> , (Å)                                                                                      | 10.604 (2)                                                                     | 13.693 (2)                                                                     |
| $\alpha$ , (deg)                                                                                    | 90                                                                             | 90                                                                             |
| $\beta$ , (deg)                                                                                     | 100.686(6)                                                                     | 99.807(3)                                                                      |
| $\gamma$ , (deg)                                                                                    | 90                                                                             | 90                                                                             |
| <i>V</i> , (Å <sup>3</sup> )                                                                        | 1309.6(4)                                                                      | 1385.1(3)                                                                      |
| <i>Z</i>                                                                                            | 4                                                                              | 4                                                                              |
| <i>D</i> calc, (g/cm <sup>3</sup> )                                                                 | 1.296                                                                          | 1.390                                                                          |
| $\mu$ (mm <sup>-1</sup> )                                                                           | 0.296                                                                          | 0.476                                                                          |
| <i>F</i> (000)                                                                                      | 544.0                                                                          | 608.0                                                                          |
| 2 $\theta$ range, (deg)                                                                             | 6.06-62.16                                                                     | 5.90-55.00                                                                     |
| reflns collected                                                                                    | 21063                                                                          | 13711                                                                          |
| indep reflns/ <i>R</i> <sub>int</sub>                                                               | 4181/0.1584                                                                    | 3186/0.0703                                                                    |
| Data/restraints/parameters                                                                          | 4181/0/145                                                                     | 3186/694/313                                                                   |
| GOF on <i>F</i> <sup>2</sup>                                                                        | 0.983                                                                          | 0.907                                                                          |
| Coverage of independent reflections                                                                 | 99.1%                                                                          | 99.9%                                                                          |
| Refinement method                                                                                   | Full-matrix least-squares on <i>F</i> <sup>2</sup>                             | Full-matrix least-squares on <i>F</i> <sup>2</sup>                             |
| <i>R</i> <sub>1</sub> , <i>wR</i> <sub>2</sub> [ <i>I</i> > 2 $\sigma$ ( <i>I</i> )] <sup>[a]</sup> | 0.0842, 0.1926                                                                 | 0.0557, 0.1271                                                                 |
| <i>R</i> <sub>1</sub> , <i>wR</i> <sub>2</sub> (all data) <sup>[a]</sup>                            | 0.1320, 0.2281                                                                 | 0.1074, 0.1465                                                                 |
| Largest diff. peak/hole (eÅ <sup>-3</sup> )                                                         | 0.69/-0.64                                                                     | 0.467/-0.467                                                                   |

$$^{[a]} R_1 = \frac{\sum ||F_o| - |F_c||}{\sum |F_o|}; wR_2 = \left\{ \frac{\sum [w(F_o^2 - F_c^2)^2]}{\sum [w(F_o^2)^2]} \right\}^{1/2}$$

**Table S3.** Bond lengths (Å) and bond angles (°) of 2NH<sub>3</sub>BH<sub>2</sub>OOCCH<sub>2</sub>Cl C<sub>12</sub>H<sub>24</sub>O<sub>6</sub> (**1**).

| Bond lengths (Å) |          | Bond angles (°) |           |
|------------------|----------|-----------------|-----------|
| B(1)-N(1)        | 1.581(3) | O(1)-B(1)-N(1)  | 102.66(5) |
| B(1)-O(1)        | 1.505(3) | C(1)-C(2)-Cl(1) | 117.5(2)  |
| C(1)-C(2)        | 1.505(4) | O(2)-C(1)-O(1)  | 125.5(3)  |
| C(2)-Cl(1)       | 1.779(3) | O(2)-C(1)-C(2)  | 116.9(2)  |
| C(2)-O(1)        | 1.303(3) | O(1)-C(1)-C(2)  | 117.5(2)  |
| C(1)-O(2)        | 1.217(3) | C(1)-O(1)-B(1)  | 118.1(2)  |

**Table S4.** Bond lengths (Å) and bond angles (°) of 2NH<sub>3</sub>BH<sub>2</sub>OOCCHCl<sub>2</sub> C<sub>12</sub>H<sub>24</sub>O<sub>6</sub> (**2**).

| Bond lengths (Å) |          | Bond angles (°)  |          |
|------------------|----------|------------------|----------|
| B(1)-N(1)        | 1.590(7) | O(1)-B(1)-N(1)   | 109.1(5) |
| B(1)-O(1)        | 1.513(7) | C(1)-C(2)-Cl(2)  | 109.0(6) |
| C(1)-C(2)        | 1.536(9) | C(1)-C(2)-Cl(1)  | 110.1(5) |
| C(2)-Cl(2)       | 1.724(7) | Cl(2)-C(2)-Cl(1) | 113.2(4) |
| C(2)-Cl(1)       | 1.750(7) | O(2)-C(1)-O(1)   | 126.9(7) |
| C(1)-O(2)        | 1.205(9) | O(2)-C(1)-C(2)   | 123.6(7) |
| C(1)-O(1)        | 1.304(8) | O(1)-C(1)-C(2)   | 109.5(7) |
|                  |          | C(1)-O(1)-B(1)   | 120.2(5) |

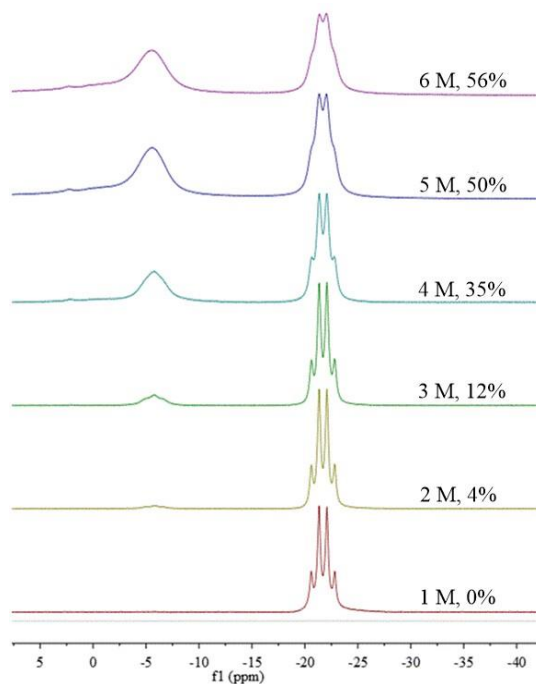

**Figure S5.**  $^{11}\text{B}$  NMR spectra of the reaction mixture of AB with  $\text{CH}_3\text{COOH}$  with different concentration in 14 h ( $c_{\text{AB}} = 1\sim 6$  M, the conversion of AB: %).

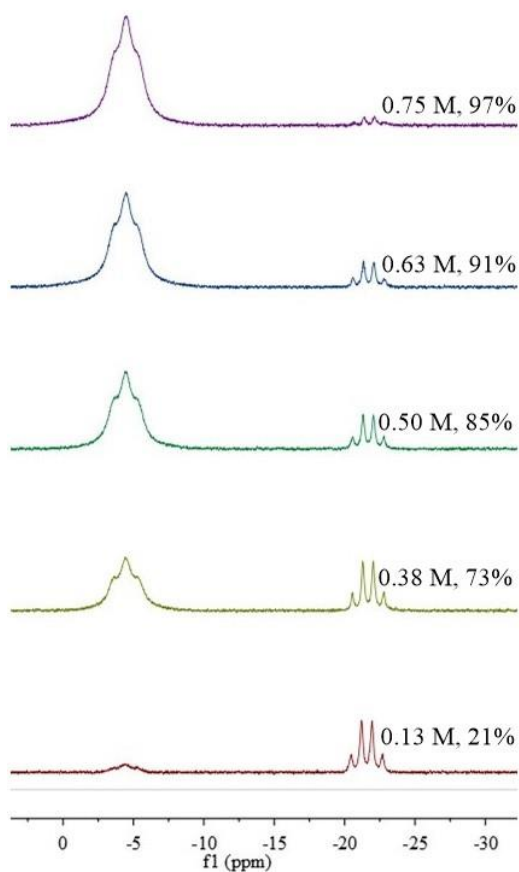

**Figure S6.**  $^{11}\text{B}$  NMR spectra of the reaction mixture of AB with  $\text{CCl}_3\text{COOH}$  at a ratio of 1:1 ( $c_{\text{AB}} = 0.13\sim 0.75$  M, the conversion of AB: %).

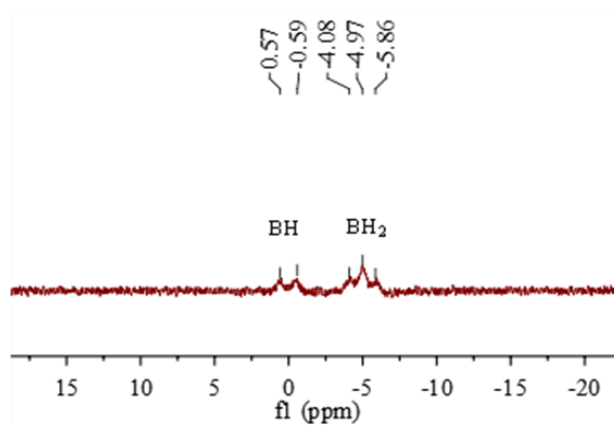

**Figure S7.**  $^{11}\text{B}$  NMR spectrum of the reaction mixture of AB with excess  $\text{ClCH}_2\text{COOH}$  over a period of 10 d.

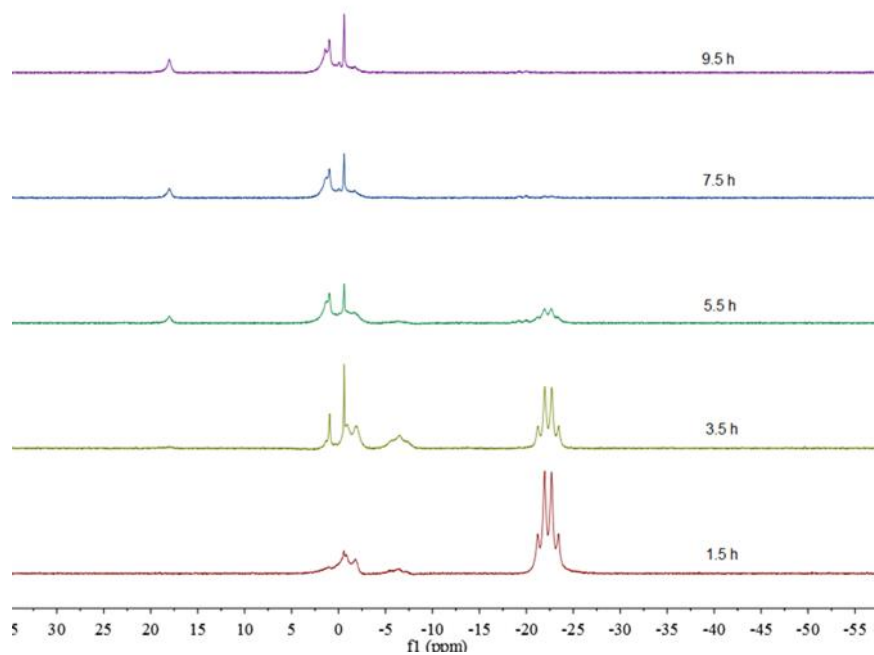

**Figure S8.**  $^{11}\text{B}$  NMR spectra of the reaction of AB with  $\text{CH}_3\text{COOH}$  at  $70\text{ }^\circ\text{C}$  ( $n_{\text{AB}}: n_{\text{acid}}$  to 1:1,  $c_{\text{AB}} = 3\text{ M}$ ).

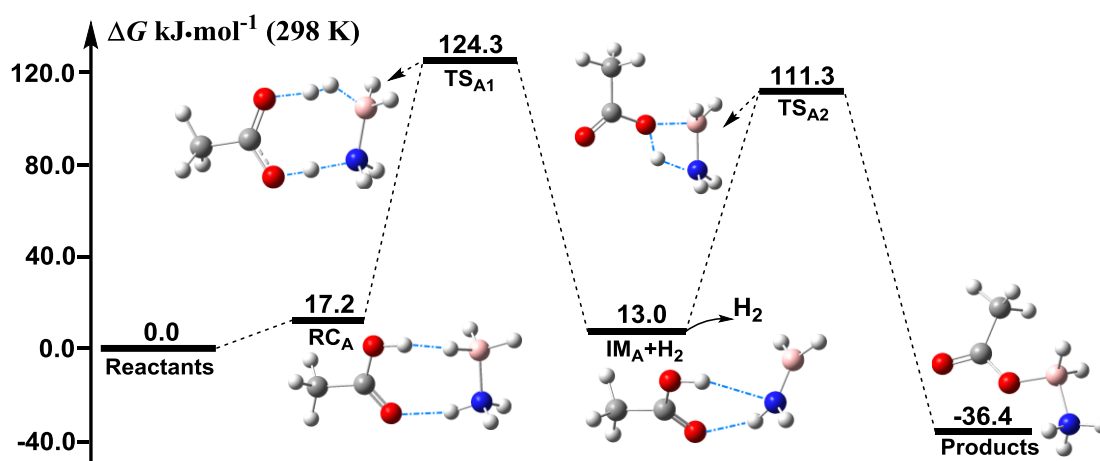Figure S9a. Energy profile of the reaction of AB with CH<sub>3</sub>COOH.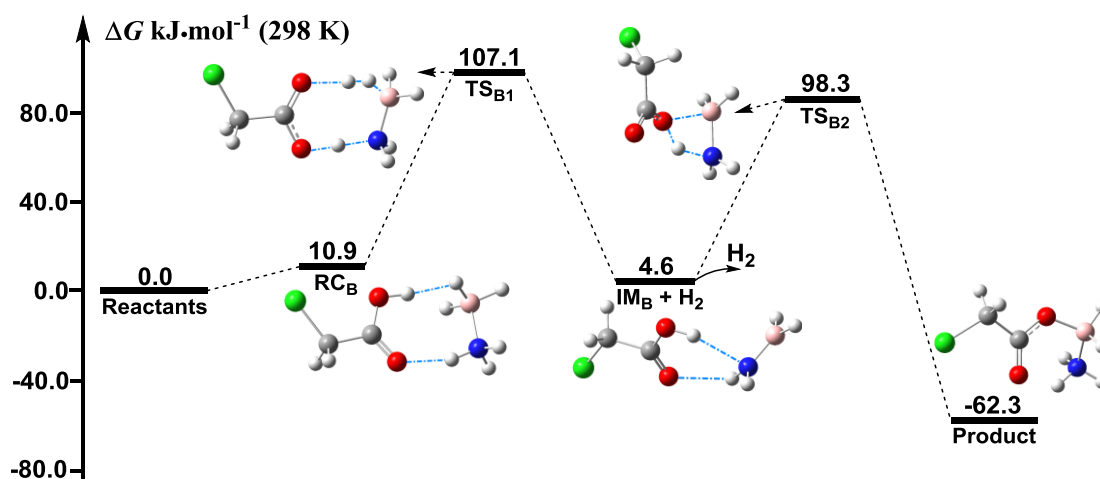Figure S9b. Energy profile of the reaction of AB with CH<sub>2</sub>ClCOOH.

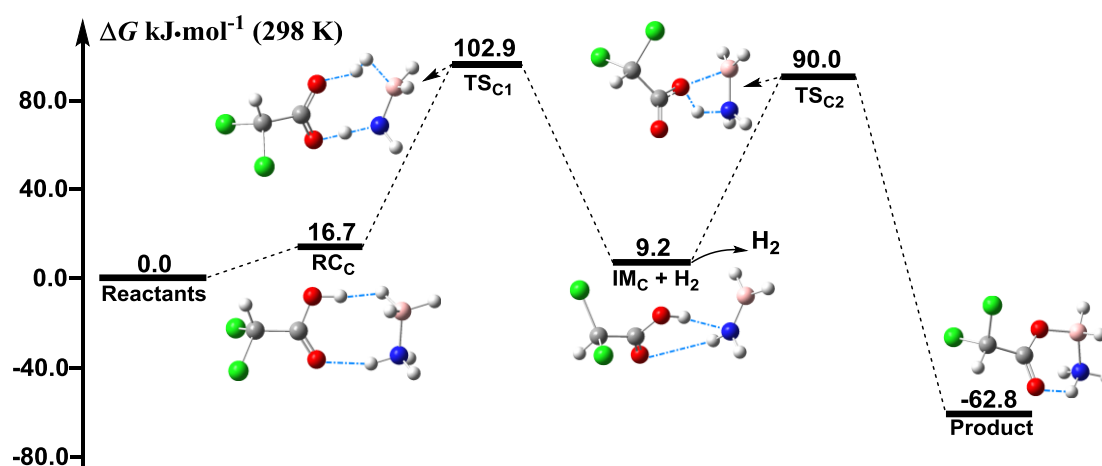

**Figure S9c.** Energy profile of the reaction of AB with  $\text{CHCl}_2\text{COOH}$ .

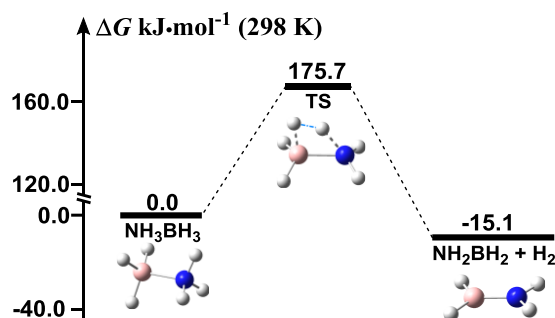

**Figure S10.** Energy profile of the decomposition of AB to produce hydrogen and  $\text{NH}_2\text{BH}_2$ .

**Table S5.** The relative energies  $\{\Delta(E+\text{ZPE})/(\text{kJ}\cdot\text{mol}^{-1})\}$ , enthalpies  $\{\Delta H (298 \text{ K})/(\text{kJ}\cdot\text{mol}^{-1})\}$ , free energy changes  $\{\Delta G (298 \text{ K})/(\text{kJ}\cdot\text{mol}^{-1})\}$  and entropy  $\{S (298 \text{ K})/(\text{J}\cdot\text{mol}^{-1})\}$  for the reactions of AB with  $\text{CH}_3\text{COOH}$ .

| Species                       | $\Delta E$ | $\Delta(E + \text{ZPE})$ | $\Delta H$ | $\Delta G$ | S     |
|-------------------------------|------------|--------------------------|------------|------------|-------|
| AB + $\text{CH}_3\text{COOH}$ | 0.0        | 0.0                      | 0.0        | 0.0        | 538.1 |
| $\text{RC}_A$                 | -32.2      | -25.9                    | -26.4      | 17.2       | 392.5 |
| $\text{TS}_{A1}$              | 92.5       | 78.2                     | 75.3       | 124.3      | 374.5 |
| $\text{IM}_A + \text{H}_2$    | 27.2       | 2.1                      | 10.0       | 13.0       | 527.6 |
| $\text{TS}_{A2}$              | 127.2      | 92.5                     | 96.2       | 111.3      | 487.0 |
| Product                       | -36.8      | -54.8                    | -50.2      | -36.4      | 491.6 |

**Table S6.** The relative energies  $\{\Delta(E + \text{ZPE})/(\text{kJ}\cdot\text{mol}^{-1})\}$ , enthalpies  $\{\Delta H (298 \text{ K})/(\text{kJ}\cdot\text{mol}^{-1})\}$ , free energy changes  $\{\Delta G (298 \text{ K})/(\text{kJ}\cdot\text{mol}^{-1})\}$  and entropy  $\{S (298 \text{ K})/(\text{J}\cdot\text{mol}^{-1})\}$  for the reactions of AB with  $\text{CH}_2\text{ClCOOH}$ .

| Species                         | $\Delta E$ | $\Delta(E + \text{ZPE})$ | $\Delta H$ | $\Delta G$ | S     |
|---------------------------------|------------|--------------------------|------------|------------|-------|
| AB + $\text{CH}_2\text{ClCOOH}$ | 0.0        | 0.0                      | 0.0        | 0.0        | 545.2 |
| $\text{RC}_B$                   | -32.6      | -26.8                    | -24.7      | 10.9       | 425.9 |
| $\text{TS}_{B1}$                | 78.7       | 64.4                     | 64.0       | 107.1      | 400.4 |
| $\text{IM}_B + \text{H}_2$      | 23.4       | -2.5                     | 8.0        | 4.6        | 556.1 |
| $\text{TS}_{B2}$                | 119.2      | 83.7                     | 90.8       | 98.3       | 519.7 |
| Product                         | -61.9      | -79.1                    | -72.8      | -62.3      | 510.4 |



**Table S7.** The relative energies  $\{\Delta(E + ZPE)/(kJ\cdot mol^{-1})\}$ , enthalpies  $\{\Delta H (298 K)/(kJ\cdot mol^{-1})\}$ , free energy changes  $\{\Delta G (298 K)/(kJ\cdot mol^{-1})\}$  and entropy  $\{S (298 K)(J\cdot mol^{-1})\}$  for the reactions of AB with  $CHCl_2COOH$ .

| Species                          | $\Delta E$ | $\Delta(E + ZPE)$ | $\Delta H$ | $\Delta G$ | S     |
|----------------------------------|------------|-------------------|------------|------------|-------|
| AB + $CHCl_2COOH$                | 0.0        | 0.0               | 0.0        | 0.0        | 595.8 |
| RC <sub>C</sub>                  | -33.5      | -27.2             | -27.2      | 16.7       | 448.1 |
| TS <sub>C1</sub>                 | 70.7       | 56.5              | 54.0       | 102.9      | 431.8 |
| IM <sub>C</sub> + H <sub>2</sub> | 23.4       | -2.1              | 5.9        | 9.2        | 585.3 |
| TS <sub>C2</sub>                 | 108.0      | 72.0              | 77.4       | 90.0       | 554.0 |
| Product                          | -66.5      | -83.3             | -79.1      | -62.8      | 541.0 |

**Table S8.** The relative energies  $\{\Delta(E + ZPE)/(kJ\cdot mol^{-1})\}$ , enthalpies  $\{\Delta H (298 K)/(kJ\cdot mol^{-1})\}$ , free energy changes  $\{\Delta G (298 K)/(kJ\cdot mol^{-1})\}$  and entropy  $\{S (298 K)(J\cdot mol^{-1})\}$  for the reactions of AB with  $CCl_3COOH$ .

| Species                          | $\Delta E$ | $\Delta(E + ZPE)$ | $\Delta H$ | $\Delta G$ | S     |
|----------------------------------|------------|-------------------|------------|------------|-------|
| AB + $CCl_3COOH$                 | 0.0        | 0.0               | 0.0        | 0.0        | 619.2 |
| RC <sub>D</sub>                  | -34.3      | -28.5             | -28.5      | 14.6       | 474.0 |
| TS <sub>D1</sub>                 | 64.0       | 49.4              | 47.3       | 94.6       | 459.8 |
| IM <sub>D</sub> + H <sub>2</sub> | 23.4       | -3.4              | 5.4        | 5.4        | 618.0 |
| TS <sub>D2</sub>                 | 99.6       | 63.6              | 69.0       | 80.3       | 580.7 |
| Product                          | -69.5      | -86.6             | -82.0      | -66.5      | 567.4 |

**Table S9.** The relative energies  $\{\Delta(E + \text{ZPE})/(\text{kJ}\cdot\text{mol}^{-1})\}$ , enthalpies  $\{\Delta H (298 \text{ K})/(\text{kJ}\cdot\text{mol}^{-1})\}$ , free energy changes  $\{\Delta G (298 \text{ K})/(\text{kJ}\cdot\text{mol}^{-1})\}$  and entropy  $\{S (298 \text{ K}) (\text{J}\cdot\text{mol}^{-1})\}$  for the reactions of AB release hydrogen without catalyst.

| Species                               | $\Delta E$ | $\Delta(E + \text{ZPE})$ | $\Delta H$ | $\Delta G$ | S     |
|---------------------------------------|------------|--------------------------|------------|------------|-------|
| AB                                    | 0.0        | 0.0                      | 0.0        | 0.0        | 248.5 |
| TS                                    | 192.5      | 175.3                    | 174.9      | 175.7      | 245.2 |
| $\text{NH}_2\text{BH}_2 + \text{H}_2$ | 41.4       | 10.5                     | 17.6       | -15.1      | 358.6 |

**Table S10.** The total rate constants for the reactions of AB with acids.

| $T/K$ | $k_r$    | $k_1$    | $k_2$    | $k_3$    | $k_4$    |
|-------|----------|----------|----------|----------|----------|
| 258   | 1.95E-20 | 8.70E-31 | 2.94E-27 | 1.54E-26 | 6.03E-25 |
| 278   | 1.02E-18 | 1.09E-29 | 2.55E-26 | 9.65E-26 | 3.05E-24 |
| 298   | 4.79E-17 | 1.00E-28 | 1.70E-25 | 4.83E-25 | 1.27E-23 |
| 318   | 1.84E-15 | 7.08E-28 | 9.09E-25 | 2.01E-24 | 4.47E-23 |
| 338   | 5.52E-14 | 4.02E-27 | 4.06E-24 | 7.16E-24 | 1.38E-22 |
| 358   | 1.26E-12 | 1.91E-26 | 1.56E-23 | 2.24E-23 | 3.79E-22 |
| 378   | 2.22E-11 | 7.75E-26 | 5.26E-23 | 6.29E-23 | 9.46E-22 |
| 398   | 3.05E-10 | 2.76E-25 | 1.59E-22 | 1.61E-22 | 2.18E-21 |

The  $r$  is the decomposition of AB into AoB and  $\text{H}_2$ , and the 1-4 are the reactions of AB react with  $\text{CH}_3\text{COOH}$ ,  $\text{CH}_2\text{ClCOOH}$ ,  $\text{CHCl}_2\text{COOH}$  and  $\text{CCl}_3\text{COOH}$ , respectively.

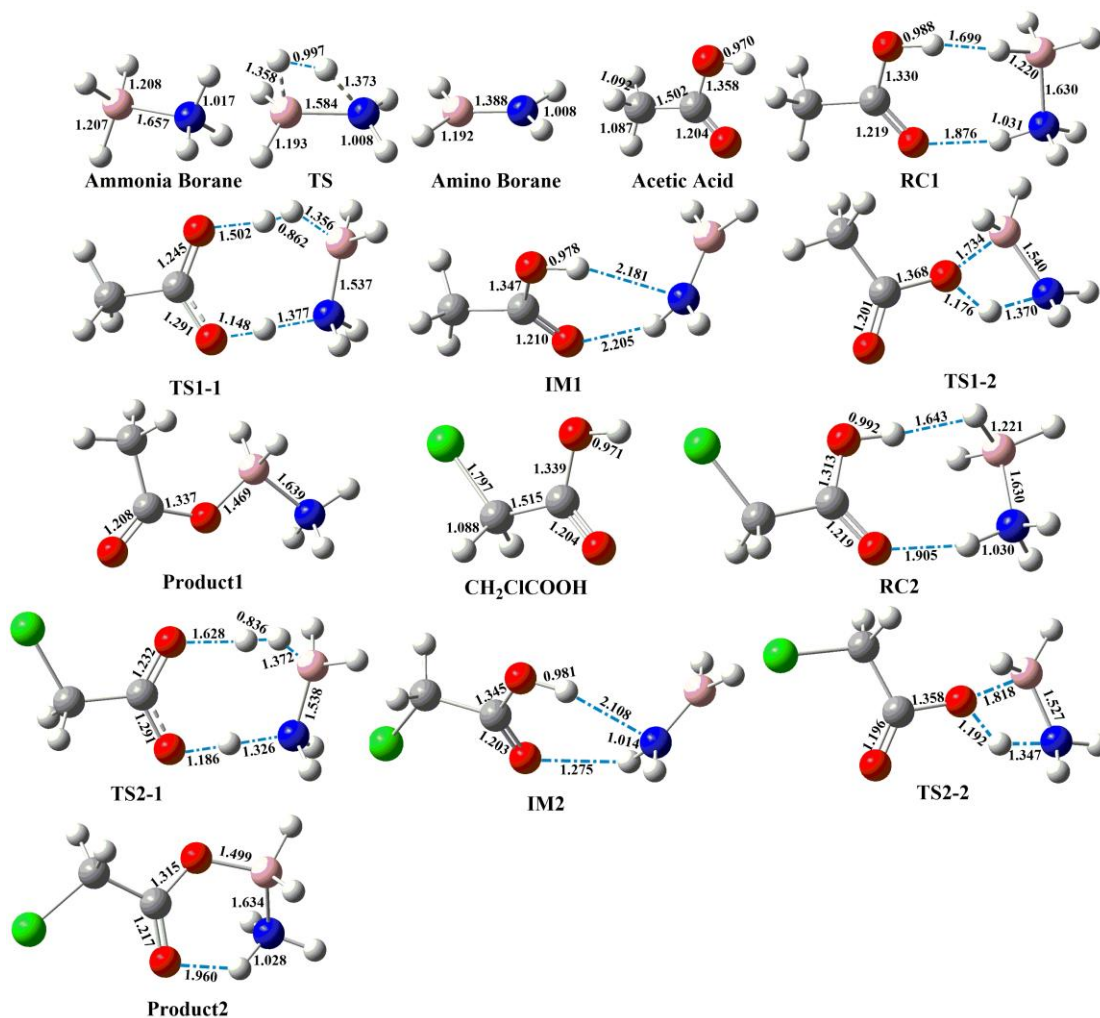

**Figure S11a.** The optimized geometry constructions of the reactions for AB, AB with acetic acid and AB with  $\text{CH}_2\text{CICOOH}$ .

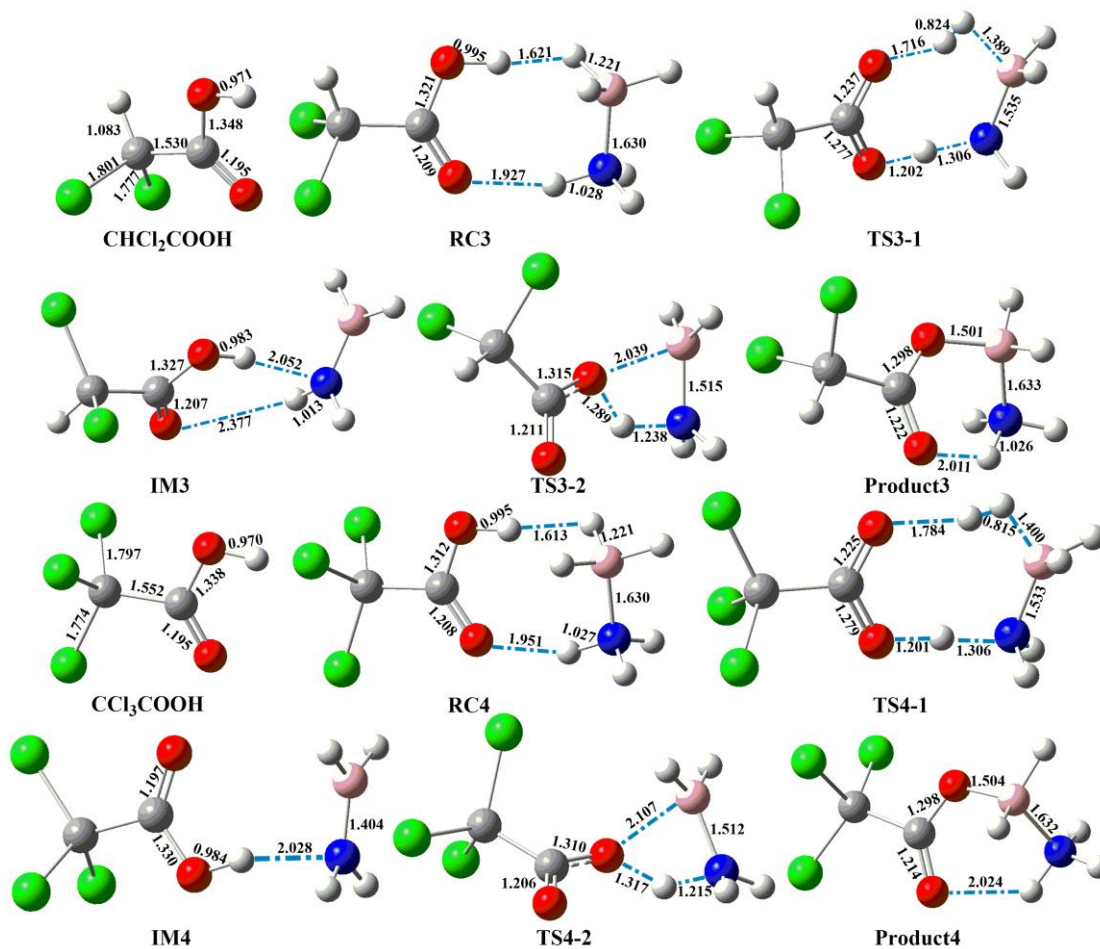

**Figure S11b.** The optimized geometry constructions of the reactions for AB with  $\text{CHCl}_2\text{COOH}$  and AB with  $\text{CCl}_3\text{COOH}$ .

## 2. The optimized cartesian coordinates of all species

### Ammonia Borane

|   |             |             |             |
|---|-------------|-------------|-------------|
| N | 0.72745900  | 0.00001600  | 0.00000000  |
| H | 1.09314700  | -0.73111300 | -0.60538100 |
| H | 1.09313000  | -0.15863800 | 0.93587600  |
| B | -0.92948300 | 0.00009900  | 0.00016500  |
| H | -1.24146900 | 0.89752800  | 0.74500600  |
| H | -1.24116700 | -1.09462100 | 0.40439100  |
| H | 1.09300100  | 0.88978400  | -0.33066000 |
| H | -1.24144000 | 0.19645100  | -1.15006000 |

### CH<sub>3</sub>COOH

|   |             |             |             |
|---|-------------|-------------|-------------|
| C | -0.08853400 | 0.12698900  | -0.00000500 |
| O | -0.62190700 | 1.20624200  | -0.00000100 |
| O | -0.79628700 | -1.03164100 | -0.00000700 |
| H | -1.73486500 | -0.78603300 | 0.00005200  |
| C | 1.39216500  | -0.12774300 | -0.00000200 |
| H | 1.66707300  | -0.71260100 | 0.87978300  |
| H | 1.66702700  | -0.71310300 | -0.87946400 |
| H | 1.92453300  | 0.81945000  | -0.00026600 |

### TS

|   |             |             |             |
|---|-------------|-------------|-------------|
| N | 0.76209200  | 0.00000000  | 0.01356800  |
| H | 1.26116400  | 0.83823000  | -0.24032500 |
| H | 1.26116400  | -0.83823000 | -0.24032600 |
| B | -0.81291400 | 0.00000000  | -0.15199500 |
| H | -1.26869200 | -1.03187000 | -0.53981700 |
| H | -1.26869200 | 1.03187000  | -0.53981600 |
| H | -0.13228800 | 0.00000000  | 1.05476100  |
| H | -1.12273100 | 0.00000000  | 1.17052200  |

### RC1

|   |             |             |             |
|---|-------------|-------------|-------------|
| N | 2.68138300  | -0.78397500 | 0.10922600  |
| H | 1.73157100  | -1.12874800 | -0.03357400 |
| H | 2.95418200  | -1.00655000 | 1.06361000  |
| B | 2.75987200  | 0.83795100  | -0.17438200 |
| H | 3.88809600  | 1.17018300  | 0.08602300  |
| H | 1.95409600  | 1.33679400  | 0.58637500  |
| H | 3.30298300  | -1.28965000 | -0.51693600 |
| H | 2.46512400  | 0.97681400  | -1.33530500 |
| C | -1.55343500 | 0.19222000  | 0.02000500  |
| O | -1.94386200 | 1.32639200  | 0.09358700  |
| O | -0.23372500 | -0.12923400 | 0.03787200  |
| H | 0.29703900  | 0.69266200  | 0.10351500  |
| C | -2.42272900 | -1.02975300 | -0.10227200 |
| H | -2.20523800 | -1.54613700 | -1.03958000 |
| H | -2.21083000 | -1.72411200 | 0.71300800  |
| H | -3.46838300 | -0.73525100 | -0.07788300 |

### NH<sub>2</sub>BH<sub>2</sub>

|   |            |             |             |
|---|------------|-------------|-------------|
| N | 0.00000000 | 0.00000000  | 0.61065500  |
| H | 0.00000000 | 0.84353800  | 1.16284600  |
| H | 0.00000000 | -0.84353800 | 1.16284600  |
| B | 0.00000000 | 0.00000000  | -0.77775100 |
| H | 0.00000000 | -1.04237500 | -1.35576100 |
| H | 0.00000000 | 1.04237500  | -1.35576100 |

|              |             |             |             |                 |             |             |             |  |
|--------------|-------------|-------------|-------------|-----------------|-------------|-------------|-------------|--|
| <b>TS1-1</b> |             |             |             | H               | -3.20565300 | 0.78551800  | 0.29329700  |  |
| N            | -2.01671600 | -0.78732300 | 0.01456500  | H               | -3.06657100 | -0.64595600 | -0.76721100 |  |
| H            | -0.65027100 | -0.94633200 | -0.05594100 | H               | -2.87693100 | -0.83239600 | 0.97131900  |  |
| H            | -2.44975200 | -1.26564200 | -0.76978600 |                 |             |             |             |  |
| B            | -2.41464200 | 0.69436900  | 0.11322100  | <b>TS1-2</b>    |             |             |             |  |
| H            | -3.39657700 | 1.02419700  | -0.49288100 | N               | 2.31230500  | -0.37445500 | 0.15100800  |  |
| H            | -1.64260000 | 1.42640700  | -0.72822100 | H               | 1.09813500  | -0.74144000 | -0.36750800 |  |
| H            | -2.30287400 | -1.28600900 | 0.85152100  | H               | 3.10640100  | -0.41364500 | -0.47520800 |  |
| H            | -2.30817300 | 1.14565100  | 1.21370400  | B               | 1.46954200  | 0.91503400  | 0.15500700  |  |
| C            | 1.12027300  | 0.05749900  | -0.02427400 | H               | 1.78389500  | 1.74571100  | -0.63802300 |  |
| O            | 0.49138500  | -1.06805000 | -0.08232000 | H               | 2.55746200  | -0.77574300 | 1.04712600  |  |
| O            | 0.56539900  | 1.17230000  | -0.03963900 | H               | 1.06996400  | 1.25253300  | 1.22821700  |  |
| H            | -0.91101000 | 1.26396400  | -0.30158300 | C               | -1.03883200 | -0.26316600 | -0.07168100 |  |
| C            | 2.61966200  | -0.04160500 | 0.07248600  | O               | 0.20315900  | -0.01037900 | -0.58539200 |  |
| H            | 3.07044800  | 0.94737900  | 0.05136700  | O               | -1.39773700 | -1.38612100 | 0.15679300  |  |
| H            | 2.88669900  | -0.55094900 | 1.00073500  | C               | -1.86493200 | 0.97732000  | 0.12226600  |  |
| H            | 3.00045100  | -0.64860400 | -0.75057500 | H               | -2.85342100 | 0.70637100  | 0.48425100  |  |
|              |             |             |             | H               | -1.37271700 | 1.64026600  | 0.83658100  |  |
| <b>IM1</b>   |             |             |             | H               | -1.94436100 | 1.51904200  | -0.82225500 |  |
| N            | 2.25236600  | 0.34993000  | -0.39747200 |                 |             |             |             |  |
| H            | 0.41929300  | -0.82663600 | -0.29692400 | <b>Product1</b> |             |             |             |  |
| H            | 2.45821900  | 0.36961800  | -1.38591100 | N               | 2.57372300  | -0.23754100 | 0.00031800  |  |
| B            | 3.06260200  | -0.32029100 | 0.51741200  | H               | 2.59194100  | -0.83992200 | 0.82198000  |  |
| H            | 3.96946100  | -0.97970900 | 0.11369300  | H               | 2.59273900  | -0.84001000 | -0.82125200 |  |
| H            | 1.50746800  | 0.98589900  | -0.13231500 | B               | 1.20619900  | 0.66505700  | -0.00021500 |  |
| H            | 2.80904100  | -0.23679700 | 1.67853100  | H               | 1.24822200  | 1.32264900  | -1.01365000 |  |
| C            | -1.21392600 | 0.08746300  | 0.00314800  | H               | 3.40921900  | 0.34274600  | 0.00067500  |  |
| O            | -0.53125400 | -1.04903800 | -0.23675000 | H               | 1.24741000  | 1.32244100  | 1.01337800  |  |
| O            | -0.67732200 | 1.16821400  | 0.09936300  | C               | -1.12698300 | -0.25498000 | 0.00004500  |  |
| C            | -2.69028900 | -0.15763100 | 0.13349500  | O               | 0.20148800  | -0.40698800 | -0.00070200 |  |

|                             |             |             |             |              |             |             |             |
|-----------------------------|-------------|-------------|-------------|--------------|-------------|-------------|-------------|
| O                           | -1.85588800 | -1.21885900 | 0.00019200  | H            | -1.79508100 | 1.20859800  | 1.19797100  |
| C                           | -1.64285200 | 1.16737100  | 0.00014200  | H            | -1.86953400 | 1.64184600  | -0.51344800 |
| H                           | -2.72981000 | 1.15637600  | -0.00007900 | Cl           | -2.93588800 | -0.42838400 | -0.07139600 |
| H                           | -1.27650400 | 1.70259800  | 0.87911700  |              |             |             |             |
| H                           | -1.27606600 | 1.70306200  | -0.87836300 | <b>TS2-1</b> |             |             |             |
|                             |             |             |             | N            | -3.04958800 | -0.47787600 | 0.01949600  |
| <b>CH<sub>2</sub>ClCOOH</b> |             |             |             | H            | -1.79763000 | -0.91035000 | -0.04256800 |
| C                           | -1.04471400 | -0.06543500 | 0.00035600  | H            | -3.56916900 | -0.85509100 | -0.76797100 |
| O                           | -2.10561900 | -0.63491400 | -0.00869500 | B            | -3.13662600 | 1.05336500  | 0.12750700  |
| O                           | -0.90992900 | 1.26709400  | 0.00521400  | H            | -4.03697100 | 1.58103900  | -0.46115900 |
| H                           | -1.80579800 | 1.64144000  | -0.00025800 | H            | -2.27513800 | 1.62439400  | -0.77550400 |
| C                           | 0.25126600  | -0.84951300 | 0.01034700  | H            | -3.43726100 | -0.90692500 | 0.85496600  |
| H                           | 0.25762300  | -1.47205300 | 0.90246700  | H            | -2.90888900 | 1.47496200  | 1.21834300  |
| H                           | 0.25566900  | -1.49782600 | -0.86298300 | C            | 0.17788800  | -0.32007100 | -0.03543200 |
| Cl                          | 1.77515100  | 0.10357000  | -0.00444700 | O            | -0.67373000 | -1.28948400 | -0.07042200 |
|                             |             |             |             | O            | -0.09638000 | 0.88115100  | -0.05924000 |
| <b>RC2</b>                  |             |             |             | H            | -1.63775500 | 1.34002000  | -0.31511500 |
| N                           | 3.41598700  | 0.45999000  | -0.10153800 | C            | 1.60843100  | -0.82873800 | 0.04901500  |
| H                           | 2.51092500  | 0.94981900  | -0.08230200 | H            | 1.72868900  | -1.38762700 | 0.97498900  |
| H                           | 3.85944800  | 0.64219100  | -0.99844100 | H            | 1.79687900  | -1.50024400 | -0.78564200 |
| B                           | 3.16998800  | -1.13300800 | 0.13890900  | Cl           | 2.85943800  | 0.45750900  | 0.01655600  |
| H                           | 4.22655500  | -1.69549300 | 0.01778700  |              |             |             |             |
| H                           | 2.39768300  | -1.47732700 | -0.74131200 | <b>IM2</b>   |             |             |             |
| H                           | 4.01296100  | 0.85292200  | 0.62161600  | N            | -3.14198700 | -0.52084700 | -0.39319700 |
| H                           | 2.69584600  | -1.23651000 | 1.24483300  | H            | -1.56163800 | 0.86444800  | -0.22906000 |
| C                           | -0.24025900 | 0.38794900  | 0.01321000  | H            | -3.38589600 | -0.45539800 | -1.37126500 |
| O                           | 0.62831500  | 1.24057400  | -0.05488800 | B            | -3.99599800 | -0.07458300 | 0.61704700  |
| O                           | -0.04019200 | -0.90954300 | -0.01861500 | H            | -4.98334400 | 0.52033900  | 0.31738600  |
| H                           | 0.92681300  | -1.11295300 | -0.10700800 | H            | -2.33420800 | -1.11006300 | -0.22429200 |
| C                           | -1.68013200 | 0.82976900  | 0.18317000  | H            | -3.69485900 | -0.27415400 | 1.75169100  |

|                 |             |             |             |                             |             |             |             |
|-----------------|-------------|-------------|-------------|-----------------------------|-------------|-------------|-------------|
| C               | 0.22439900  | 0.24276900  | -0.08214300 | H                           | 2.84938200  | 0.79133300  | 1.34925700  |
| O               | -0.66150600 | 1.25046100  | -0.17211500 | H                           | 3.16706100  | -1.49954700 | 0.23668100  |
| O               | -0.07087700 | -0.92301100 | -0.09338300 | C                           | 0.04960300  | -0.13530000 | -0.11141200 |
| C               | 1.62255200  | 0.81801700  | 0.03679300  | O                           | 1.02550400  | -0.98321500 | 0.13009200  |
| H               | 1.81911100  | 1.46597900  | -0.81528300 | O                           | 0.18612800  | 1.03470300  | -0.41816000 |
| H               | 1.68517100  | 1.41590500  | 0.94453400  | C                           | -1.29467600 | -0.82791500 | 0.04393600  |
| Cl              | 2.89452500  | -0.43485500 | 0.09938300  | H                           | -1.43851900 | -1.50226000 | -0.79925600 |
|                 |             |             |             | H                           | -1.30208300 | -1.41317300 | 0.95983100  |
| <b>TS2-2</b>    |             |             |             | Cl                          | -2.68832400 | 0.29976300  | 0.08692800  |
| N               | 3.19229900  | 0.16482900  | -0.33921800 |                             |             |             |             |
| H               | 2.12281100  | 0.60975500  | 0.34734300  | <b>CHCl<sub>2</sub>COOH</b> |             |             |             |
| H               | 3.33799700  | 0.61057300  | -1.23632200 | C                           | 1.14646000  | -0.32213100 | 0.07149500  |
| B               | 2.26361300  | -1.04632800 | -0.28711700 | O                           | 1.35268800  | -0.93432400 | 1.07672800  |
| H               | 1.66180100  | -1.28271300 | -1.28718600 | O                           | 2.10371800  | 0.15305400  | -0.75034600 |
| H               | 4.06174700  | 0.11688600  | 0.17671400  | H                           | 2.96259600  | -0.06400200 | -0.35300400 |
| H               | 2.57196700  | -1.92016700 | 0.45567700  | C                           | -0.22738300 | 0.06251700  | -0.48000300 |
| C               | -0.05622700 | 0.45458800  | 0.26779200  | H                           | -0.19082600 | 0.20967300  | -1.55263300 |
| O               | 1.15371000  | 0.00880200  | 0.69302800  | Cl                          | -1.43230100 | -1.19810900 | -0.13863800 |
| O               | -0.25663200 | 1.58806700  | -0.05853600 | Cl                          | -0.68166800 | 1.64882500  | 0.24132200  |
| C               | -1.07350700 | -0.66966200 | 0.30983000  |                             |             |             |             |
| H               | -0.73104000 | -1.48903600 | -0.31978000 | <b>RC3</b>                  |             |             |             |
| H               | -1.15887700 | -1.03346600 | 1.33245000  | N                           | -3.57885700 | 0.42165000  | -0.88448500 |
| Cl              | -2.70169300 | -0.17755900 | -0.24708500 | H                           | -4.04929600 | 1.31995600  | -0.96000900 |
|                 |             |             |             | H                           | -3.91900900 | -0.16755800 | -1.64056500 |
| <b>Product2</b> |             |             |             | B                           | -3.83740200 | -0.25661100 | 0.57424500  |
| N               | 2.81244400  | 0.77713600  | 0.33213300  | H                           | -5.01064200 | -0.50300900 | 0.66900600  |
| H               | 2.05994400  | 1.40531100  | 0.02177400  | H                           | -3.44820100 | 0.54281600  | 1.39135100  |
| H               | 3.70771400  | 1.09986500  | -0.02545800 | H                           | -2.57048000 | 0.56909500  | -1.01993200 |
| B               | 2.43971300  | -0.69368700 | -0.27381700 | H                           | -3.18424900 | -1.28835800 | 0.57133100  |
| H               | 2.54971600  | -0.58162700 | -1.46705800 | C                           | -0.14315400 | -0.08234700 | 0.26151200  |



|              |             |             |             |                 |             |             |             |
|--------------|-------------|-------------|-------------|-----------------|-------------|-------------|-------------|
| O            | -0.67699300 | 0.44740400  | -0.68466000 | B               | -4.28048900 | 0.60580000  | -0.54565700 |
| O            | -0.74679600 | -0.74426900 | 1.23183000  | H               | -4.17021600 | 1.68474100  | -0.05559500 |
| H            | -1.72791800 | -0.78257100 | 1.07313700  | H               | -4.93539000 | 0.41241700  | -1.52078300 |
| C            | 1.37101400  | -0.08872700 | 0.48297700  | H               | -1.67882600 | -0.11589000 | -0.65704700 |
| H            | 1.61385300  | -0.34811800 | 1.50583400  | C               | -0.17392500 | -0.12715500 | 0.47743900  |
| Cl           | 2.07679200  | -1.37207600 | -0.56145900 | O               | -0.70234900 | -0.03194900 | -0.73583600 |
| Cl           | 2.07368400  | 1.51270000  | 0.14297200  | O               | -0.79268500 | -0.29286900 | 1.50085100  |
|              |             |             |             | C               | 1.34636200  | -0.01299000 | 0.49473700  |
| <b>TS3-1</b> |             |             |             | H               | 1.68732200  | -0.08846400 | 1.51917800  |
| N            | -3.15730900 | 0.18827600  | -0.95404300 | Cl              | 2.08648300  | -1.37136500 | -0.41595200 |
| H            | -3.34255700 | 1.12459500  | -1.30268300 | Cl              | 1.87325300  | 1.58251100  | -0.13028600 |
| H            | -3.48976500 | -0.45907800 | -1.66306800 |                 |             |             |             |
| B            | -3.82559800 | -0.01034700 | 0.41329900  | <b>TS3-2</b>    |             |             |             |
| H            | -4.81943100 | -0.67729900 | 0.43455700  | N               | 3.33904700  | -0.20081500 | -0.37967500 |
| H            | -3.83074900 | 0.95813500  | 1.10557500  | H               | 2.23868100  | -0.76751900 | -0.35069200 |
| H            | -1.85511000 | 0.10243300  | -0.89732300 | H               | 3.83466400  | -0.30149200 | 0.49851500  |
| H            | -3.20275100 | -1.05952000 | 1.07713000  | B               | 2.43626300  | 1.00436200  | -0.54970700 |
| C            | -0.21661700 | -0.07938300 | 0.34695800  | H               | 2.20130800  | 1.63314100  | 0.42384200  |
| O            | -0.65597900 | 0.04809700  | -0.84505500 | H               | 3.91884400  | -0.47831100 | -1.16266200 |
| O            | -0.88941900 | -0.23557600 | 1.37257500  | H               | 2.28831900  | 1.41206500  | -1.64910200 |
| H            | -2.56504900 | -0.54693100 | 1.17066000  | C               | 0.25716400  | -0.62909100 | 0.58595800  |
| C            | 1.30477900  | -0.03822900 | 0.52219900  | O               | 0.99945000  | -0.44032900 | -0.48317800 |
| H            | 1.55560900  | -0.12707200 | 1.57099500  | O               | 0.60906500  | -1.19991800 | 1.59447800  |
| Cl           | 2.06548200  | -1.43209100 | -0.32075000 | C               | -1.17543400 | -0.08973700 | 0.50155400  |
| Cl           | 1.97058700  | 1.52762300  | -0.05096400 | H               | -1.68695000 | -0.27890700 | 1.43629900  |
|              |             |             |             | Cl              | -1.18666000 | 1.68951700  | 0.24406100  |
| <b>IM3</b>   |             |             |             | Cl              | -2.09028200 | -0.94834800 | -0.78555600 |
| N            | -3.58330800 | -0.46470700 | 0.02247800  |                 |             |             |             |
| H            | -3.71575300 | -1.41704300 | -0.28804800 | <b>Product3</b> |             |             |             |
| H            | -3.09141000 | -0.40187700 | 0.90610800  | N               | 3.24741300  | -0.38978300 | -0.07204700 |

|                            |             |             |             |              |             |             |             |
|----------------------------|-------------|-------------|-------------|--------------|-------------|-------------|-------------|
| H                          | 2.89209300  | -0.43697300 | 0.88956400  | H            | -1.88296900 | 1.24586300  | 0.20232900  |
| H                          | 4.22652500  | -0.11543100 | -0.06586900 | H            | -4.45998900 | -1.08635700 | 0.91394000  |
| B                          | 2.34448700  | 0.72716100  | -0.84944700 | H            | -5.18392700 | 1.20423000  | -0.02064500 |
| H                          | 2.58714300  | 1.77123700  | -0.30544000 | C            | -0.44543900 | 0.00415600  | 0.06900900  |
| H                          | 3.17753400  | -1.31549300 | -0.49023500 | O            | -0.88990800 | 1.23570300  | 0.14500500  |
| H                          | 2.61821800  | 0.67242800  | -2.01456300 | O            | -1.10831600 | -1.00522300 | 0.06242000  |
| C                          | 0.41053800  | 0.07679800  | 0.50662500  | H            | -3.37671300 | 1.25782000  | 0.81086500  |
| O                          | 0.91011500  | 0.32650000  | -0.66459900 | C            | 1.10810000  | -0.03303900 | -0.00927700 |
| O                          | 1.02897300  | -0.06748400 | 1.55110100  | Cl           | 1.63525600  | 0.89909800  | -1.44895600 |
| C                          | -1.11024400 | -0.08314600 | 0.53101300  | Cl           | 1.76627900  | 0.71366100  | 1.48651400  |
| H                          | -1.43758900 | -0.22068500 | 1.55323400  | Cl           | 1.68441800  | -1.70936200 | -0.14057500 |
| Cl                         | -1.93492800 | 1.37377500  | -0.10556200 |              |             |             |             |
| Cl                         | -1.58464300 | -1.56768300 | -0.37284700 | <b>TS4-1</b> |             |             |             |
|                            |             |             |             | N            | -3.59272200 | -0.75869000 | -0.03754500 |
| <b>CCl<sub>3</sub>COOH</b> |             |             |             | H            | -2.29395000 | -0.86359100 | 0.05622100  |
| C                          | 1.26219000  | 0.47181700  | -0.00017600 | H            | -3.82622200 | -1.23167300 | -0.90638500 |
| O                          | 1.58313100  | 1.62242800  | -0.00026800 | B            | -4.07911200 | 0.69474700  | -0.08060000 |
| O                          | 2.10725500  | -0.56590600 | -0.00018000 | H            | -4.00064500 | 1.21414100  | -1.14836300 |
| H                          | 3.00800000  | -0.20500300 | -0.00022100 | H            | -2.75646900 | 1.37470500  | 0.33726300  |
| C                          | -0.21114600 | -0.01715000 | -0.00001400 | H            | -4.01011100 | -1.30217700 | 0.71282900  |
| Cl                         | -1.31319400 | 1.37311700  | -0.00025400 | H            | -5.05242400 | 0.95979700  | 0.56304400  |
| Cl                         | -0.48582300 | -1.00972500 | -1.47204600 | C            | -0.49805600 | 0.15082300  | 0.04263500  |
| Cl                         | -0.48553400 | -1.00899100 | 1.47259000  | O            | -1.00661100 | 1.26502900  | 0.00628700  |
|                            |             |             |             | O            | -1.09980200 | -0.97486200 | 0.11874700  |
| <b>RC4</b>                 |             |             |             | H            | -3.37110100 | 1.44168000  | 0.86891500  |
| N                          | -4.02664200 | -0.78887300 | 0.04309500  | C            | 1.05887400  | 0.01596700  | -0.00461000 |
| H                          | -3.05592500 | -1.12334000 | 0.03584100  | Cl           | 1.85283900  | 1.60553400  | -0.10965400 |
| H                          | -4.52796000 | -1.23870600 | -0.71879700 | Cl           | 1.60379300  | -0.82067800 | 1.49291500  |
| B                          | -4.04466200 | 0.83315500  | -0.11902600 | Cl           | 1.50465800  | -0.96590700 | -1.44479900 |
| H                          | -3.55409500 | 1.06853000  | -1.19657300 |              |             |             |             |

|              |             |             |             |                 |             |             |             |
|--------------|-------------|-------------|-------------|-----------------|-------------|-------------|-------------|
| <b>IM4</b>   |             |             |             | C               | 0.50741000  | 0.67266400  | 0.13881000  |
| N            | -4.15616100 | -0.59927600 | -0.00104500 | O               | 0.65943900  | 1.82699500  | -0.17519600 |
| H            | -2.12781000 | -0.57621500 | 0.00006700  | O               | 1.42263300  | -0.12142400 | 0.63545900  |
| H            | -4.21889500 | -1.15324100 | -0.84397100 | C               | -0.88752000 | -0.02326900 | -0.00239500 |
| B            | -4.39769000 | 0.78407500  | 0.00152100  | Cl              | -2.07852600 | 1.06369900  | -0.75346400 |
| H            | -4.48739300 | 1.34815400  | -1.04077600 | Cl              | -0.71294800 | -1.50226800 | -1.01469700 |
| H            | -4.21823600 | -1.15630100 | 0.83991400  | Cl              | -1.45184000 | -0.48286500 | 1.64470700  |
| H            | -4.48617600 | 1.34445200  | 1.04593600  |                 |             |             |             |
| C            | -0.45999700 | 0.31572900  | -0.00026100 | <b>Product4</b> |             |             |             |
| O            | -0.90382200 | 1.42706500  | -0.00115400 | N               | 3.52275200  | 0.49402300  | 0.29719500  |
| O            | -1.17107000 | -0.80800200 | 0.00059900  | H               | 3.51316100  | 0.45935300  | 1.31491200  |
| C            | 1.06475800  | 0.00722300  | 0.00008000  | H               | 2.98809500  | 1.31462800  | -0.00755000 |
| Cl           | 1.99761100  | 1.51655800  | 0.00019700  | B               | 2.82317700  | -0.81102400 | -0.38913900 |
| Cl           | 1.45965700  | -0.94722300 | 1.47221700  | H               | 2.97742800  | -0.67494600 | -1.57269400 |
| Cl           | 1.45982900  | -0.94712900 | -1.47217500 | H               | 4.48855200  | 0.58122800  | -0.00921700 |
|              |             |             |             | H               | 3.31890900  | -1.78877400 | 0.09292800  |
| <b>TS4-2</b> |             |             |             | C               | 0.64301000  | 0.28794400  | -0.21936300 |
| N            | 3.70847800  | 0.34717100  | 0.18031400  | O               | 1.03211900  | 1.39716600  | -0.52230000 |
| H            | 2.61002900  | 0.44479200  | 0.69088200  | O               | 1.36776600  | -0.76827900 | -0.01278500 |
| H            | 3.95080900  | 1.20019200  | -0.31148500 | C               | -0.87468700 | 0.00391600  | 0.00781300  |
| B            | 3.01191400  | -0.74438700 | -0.60004000 | Cl              | -1.85000500 | 1.45100700  | -0.33485700 |
| H            | 2.59569700  | -0.45815800 | -1.66796700 | Cl              | -1.39215500 | -1.33533900 | -1.06768500 |
| H            | 4.43228400  | 0.07962900  | 0.83718000  | Cl              | -1.10315200 | -0.47312600 | 1.73177400  |
| H            | 3.15266500  | -1.85125800 | -0.21247300 |                 |             |             |             |
